# Supplementary material
Source: ML conference proceedings conference paper supplement (https://proceedings.mlr.press/v80/srouji18a.html)
Supplement: Supplementary file 1 [file srouji18a-supp.pdf]

Appendix A: Atari Results

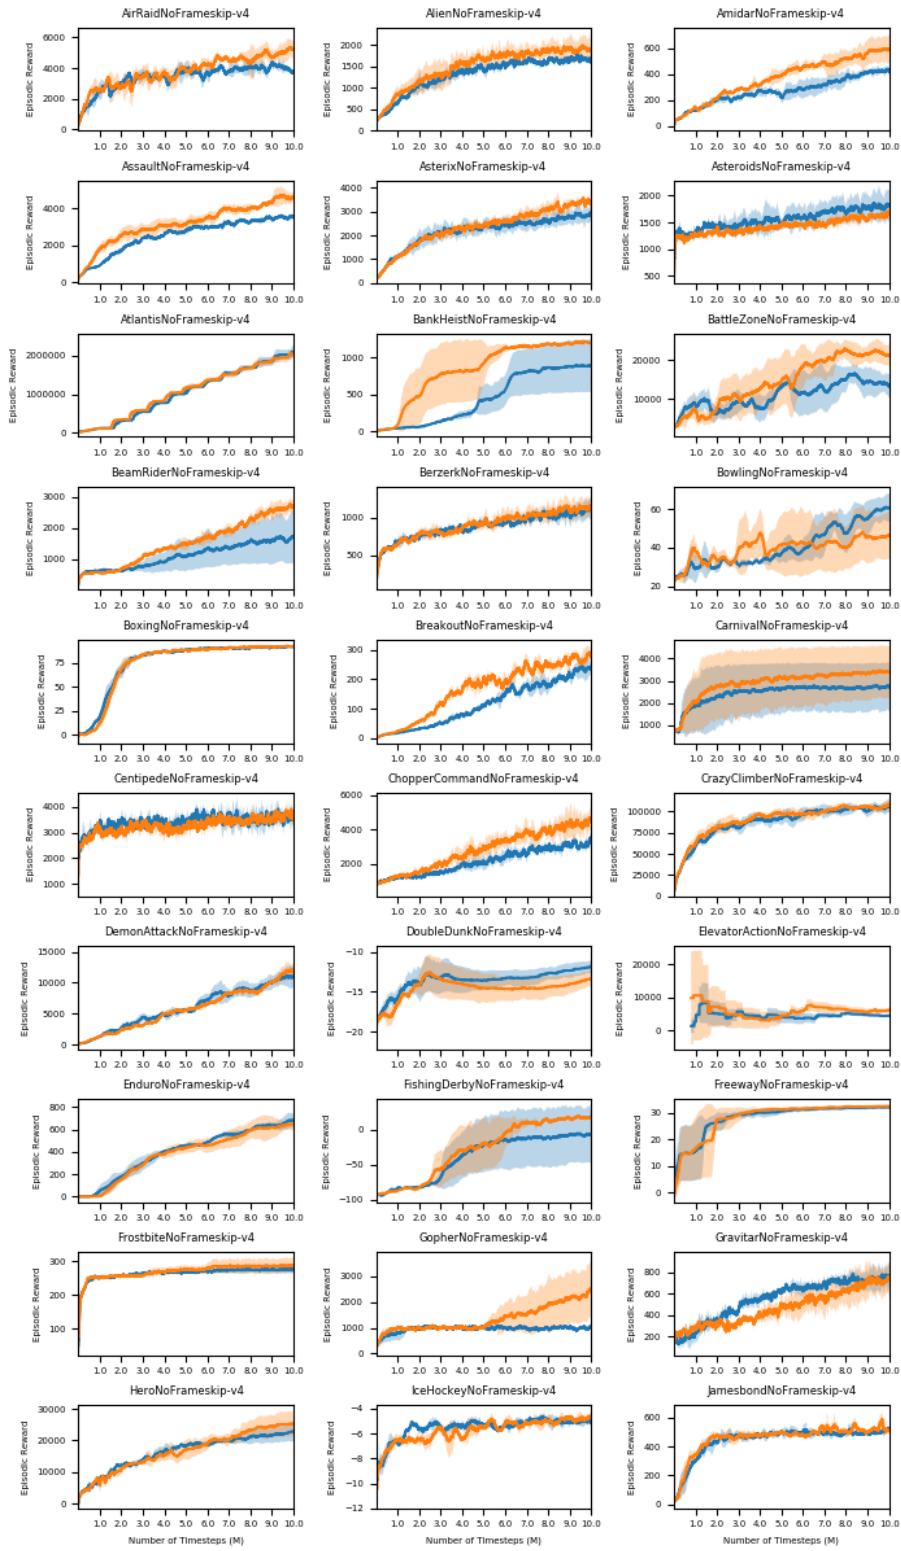

Figure 11. Comparison of SCN-8 (blue) and MLP-512 (orange) on number 1-30 of all 60 Atari games included in OpenAI Gym at the time of publication.

## Structured Control Nets for Deep Reinforcement Learning

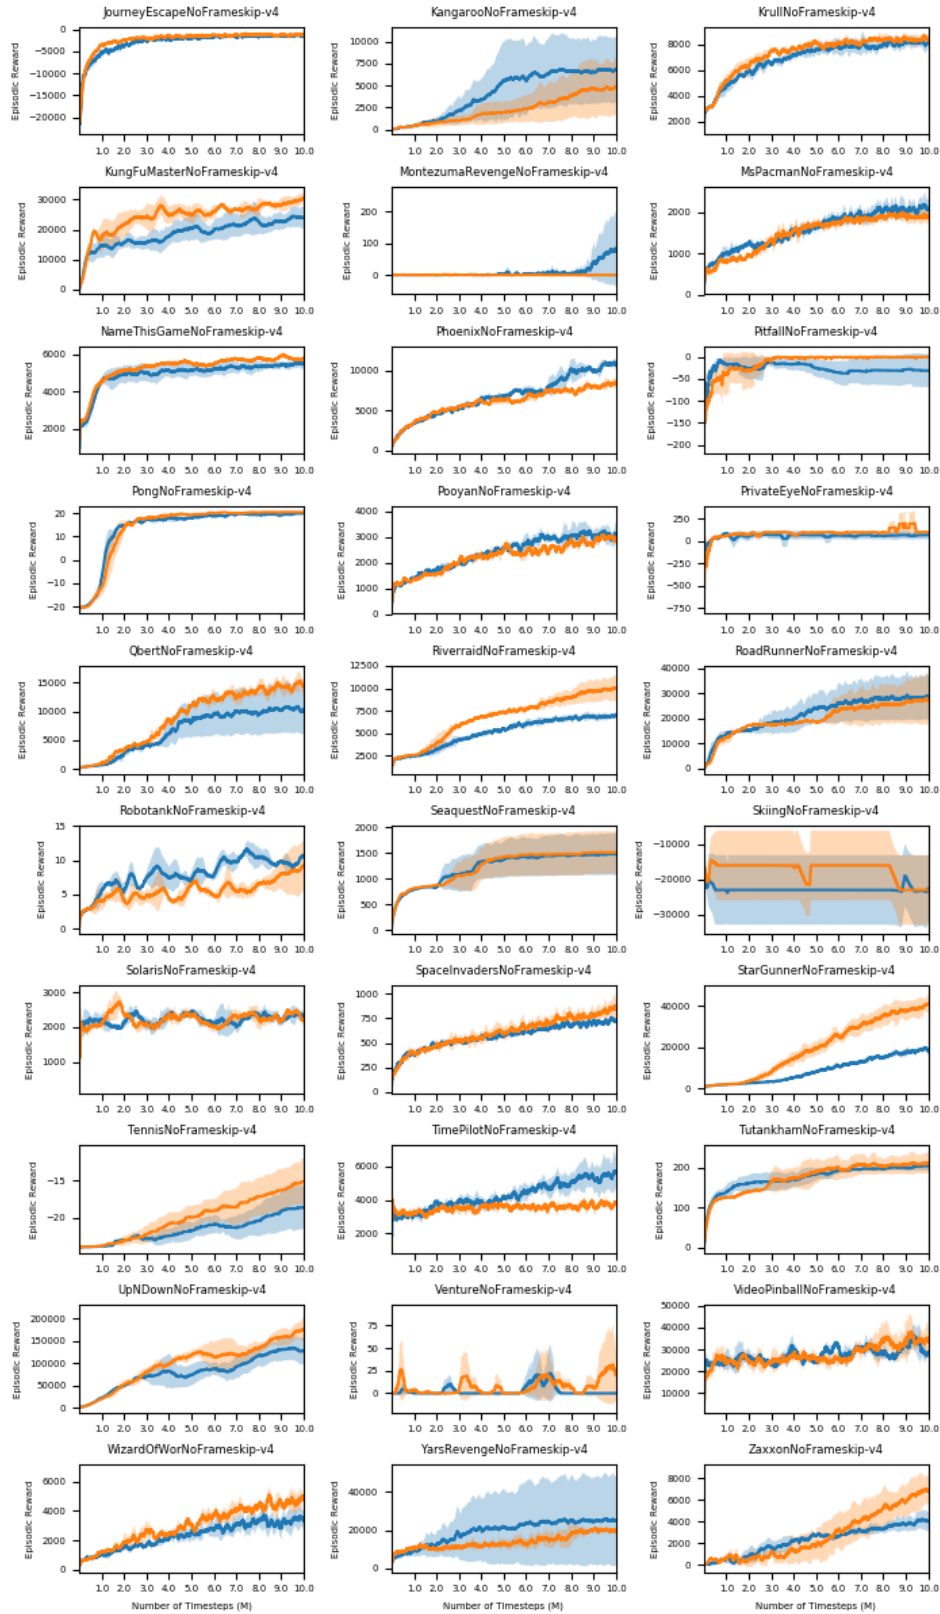

Figure 12. Comparison of SCN-8 (blue) and MLP-512 (orange) on number 31-60 of all 60 Atari games included in OpenAI Gym at the time of publication.
